# Supplementary material for: Antioxidant and Anti-Inflammatory Effects of Extracts from Pulsed Electric Field-Treated Artichoke By-Products in Lipopolysaccharide-Stimulated Human THP-1 Macrophages
Source: MDPI journal article supplement (doi:10.3390/foods11152250), 2022-07-28
Supplement: s1 [file s1]

**Supplementary Table S1.** Oligonucleotides used in this study.

| Gene Name                                | Gene Symbol     | Species | Primer Sequences |                              |
|------------------------------------------|-----------------|---------|------------------|------------------------------|
| 18s rRNA                                 | 18S             | Human   | Forward          | 5'-CCCACTCCTCCACCTTTGAC-3'   |
|                                          |                 |         | Reverse          | 5'-TGTTGCTGTAGCCAAATTCGTT-3' |
| Interleukin 6                            | IL-6            | Human   | Forward          | 5'-CCAGGAGCCCAGCTATGAAC-3'   |
|                                          |                 |         | Reverse          | 5'-CCCAGGGAGAAGGCAACTG-3'    |
| Monocyte<br>Chemoattractant<br>Protein-1 | MCP-1<br>/CCL-2 | Human   | Forward          | 5'-CAGCCAGATGCAATCAATGCC-3'  |
|                                          |                 |         | Reverse          | 5'-TGGAATCCTGAACCCACTTCT-3'  |
